# Supplementary material for: Directional nanotopographic gradients: a high-throughput screening platform for cell contact guidance
Source: PubMed Central journal article supplement (PMC4647116; doi:10.1038/srep16240), 2015-11-17
Supplement: srep16240-s1.pdf [file srep16240-s1.pdf]

# SUPPORTING INFORMATION

## **Directional nanotopographic gradients: a high-throughput screening platform for cell contact guidance**

Qihui Zhou,<sup>a,b</sup> Philipp T. Kühn,<sup>a,b</sup> Thirsa Huisman,<sup>a</sup> Elsje Nieboer,<sup>a</sup> Charlotte van Zwol,<sup>a</sup> Theo G. van Kooten,<sup>a,b</sup> and Patrick van Rijn<sup>a,b,c\*</sup>

<sup>a</sup> Biomedical Engineering Department-FB40, University of Groningen, University Medical Center Groningen, A. Deusinglaan 1, 9713 AV, Groningen, The Netherlands.

<sup>b</sup> W.J. Kolff Institute for Biomedical Engineering and Materials Science-FB41, University of Groningen, University Medical Center Groningen, Antonius Deusinglaan 1, 9713AW Groningen, Netherlands.

<sup>c</sup> Zernike Institute for Advanced Materials, University of Groningen, Nijenborgh 4, 9747 AG, Groningen, Netherlands.

**S1: Experimental setup and approach for surface wrinkle gradient formation**

**S2: Details on sub-nano wrinkle features**

**S3: Images for focal adhesion area/cell determination**

**S4: Analysis of surface features reached with longer oxidation times**

**S5: Linearity analysis of focal adhesion area/cell on non-gradient substrates**

## S1: Experimental setup and approach for surface wrinkle formation

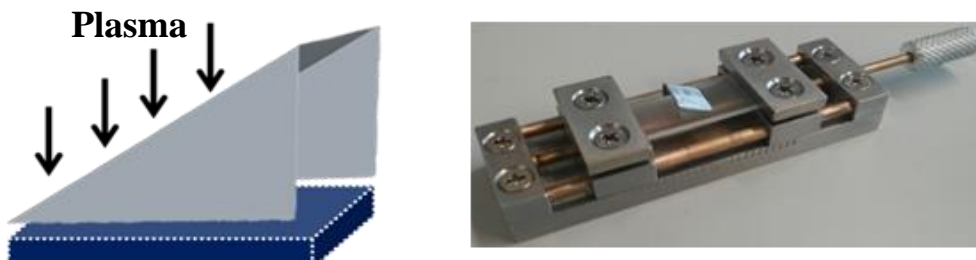

**Figure S1.** Schematic diagram and picture of formation of wrinkle gradient by air plasma oxidation.

## S2: Details on sub-nano wrinkle features

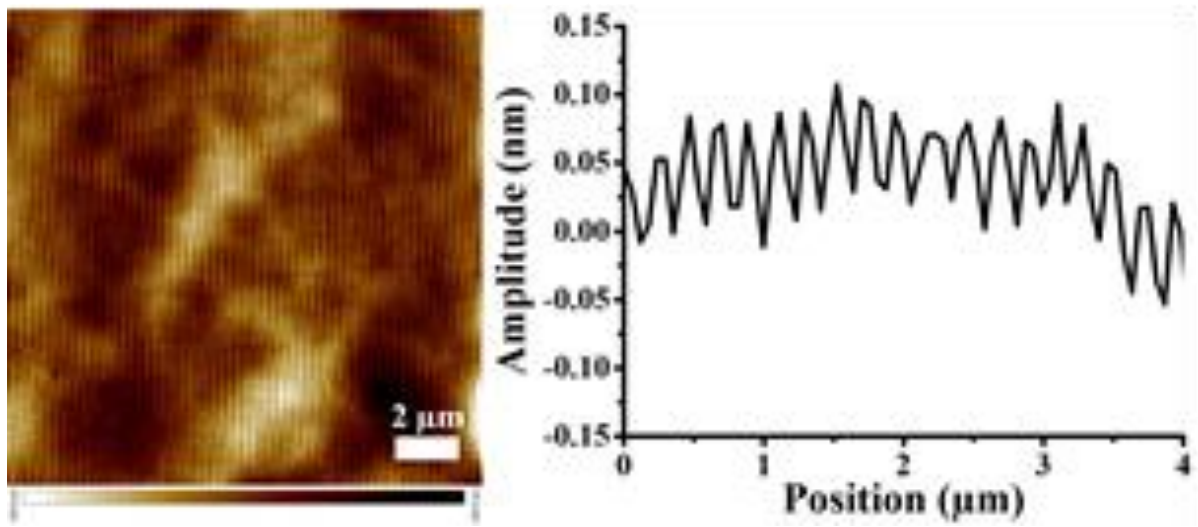

**Figure S2.** Zoom of surface features on position 0 cm on gradient formed using 50 s plasma treatment determined by atomic force microscopy.

### S3: Images for focal adhesion area/cell determination

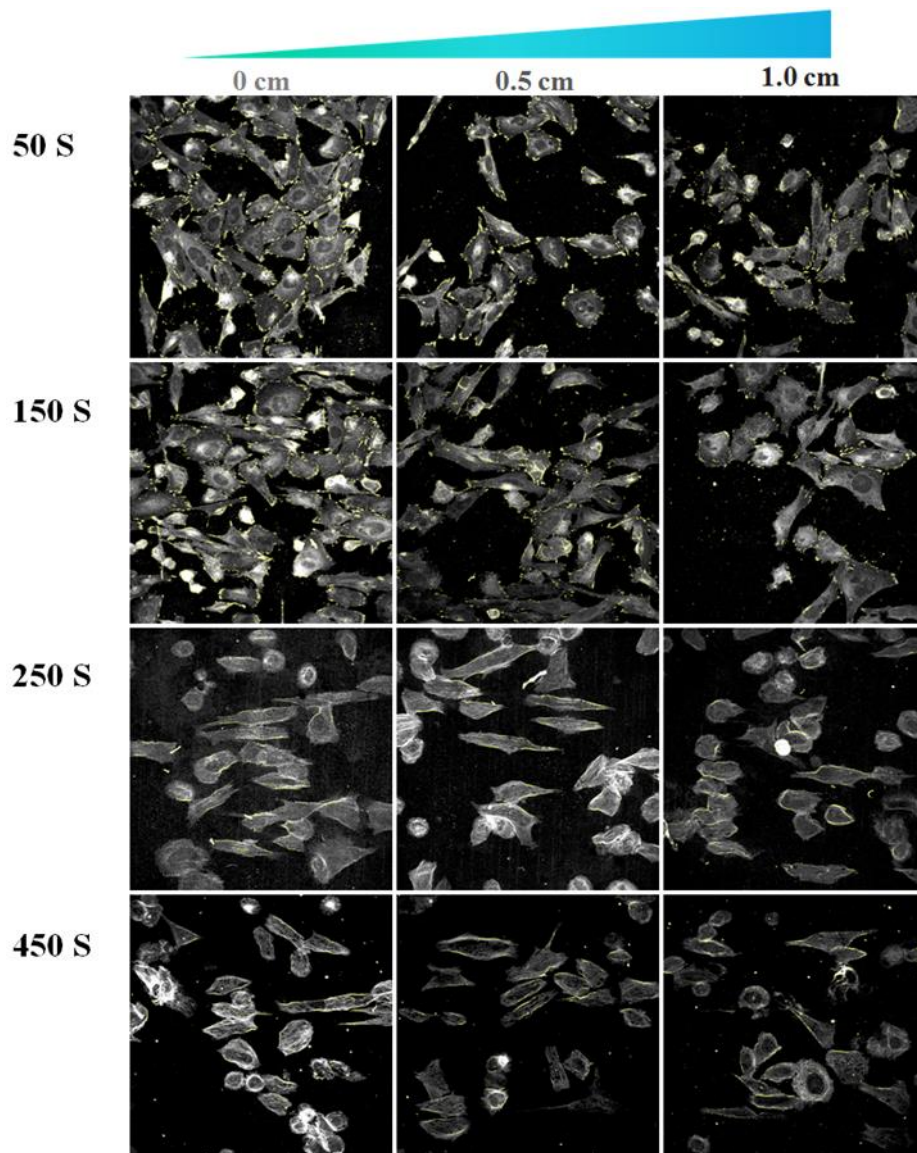

**Figure S3.** The highlight of focal adhesion contact points via Focal Adhesion Analysis Server ([http://faas.bme.unc.edu/upload?static=1&max\\_adhesion\\_count=5000](http://faas.bme.unc.edu/upload?static=1&max_adhesion_count=5000)) for SaOs after 2 days cultivation on gradient surfaces.

## S4: Analysis of surface features reached with longer oxidation times

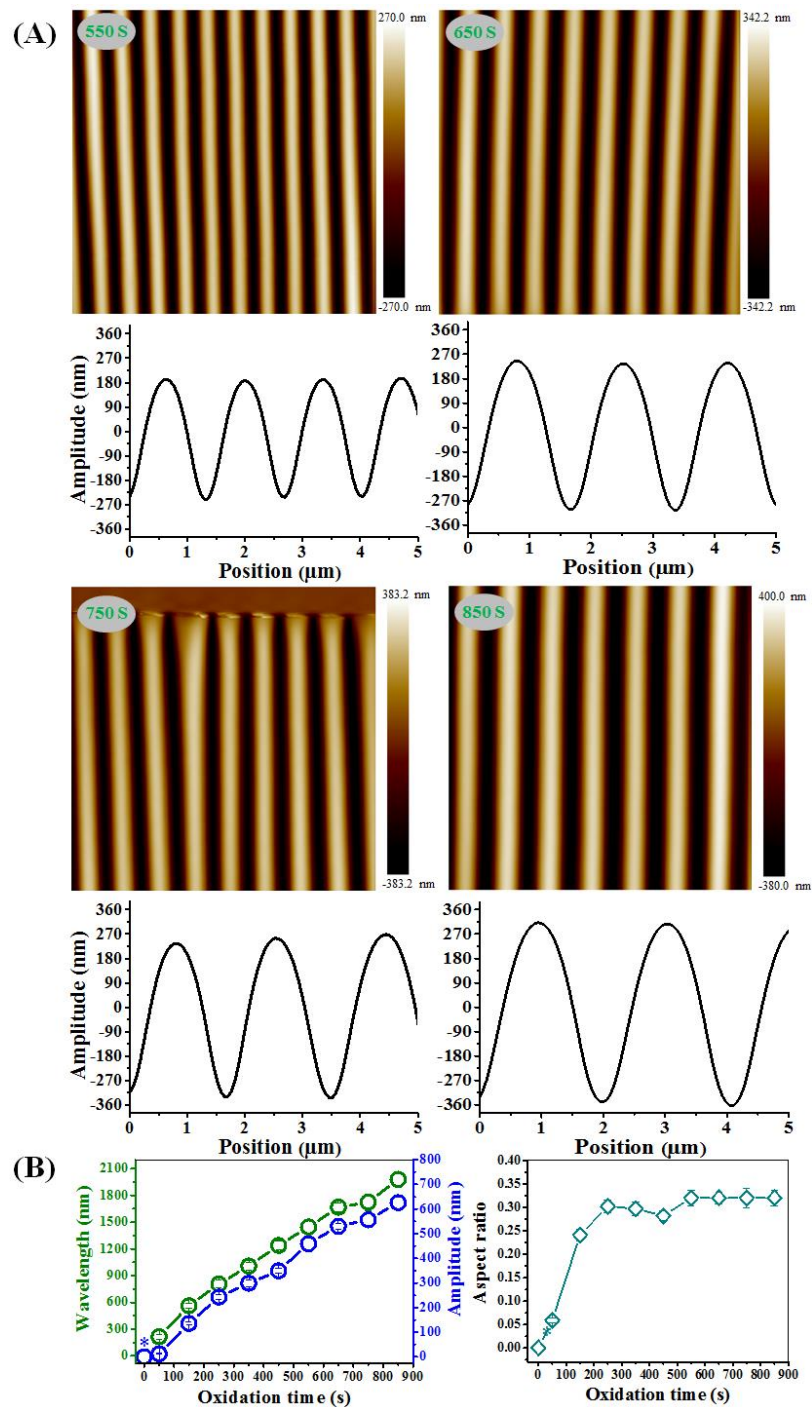

**Figure S4.** Dependence of the wavelength, height and aspect ratio of created wrinkles on the plasma oxidation time from 0 s-850 s with a fixed initial strain (30% substrate elongation). \* indicates approximate value.

## S5: Linearity analysis of focal adhesion area/cell on non-gradient substrates

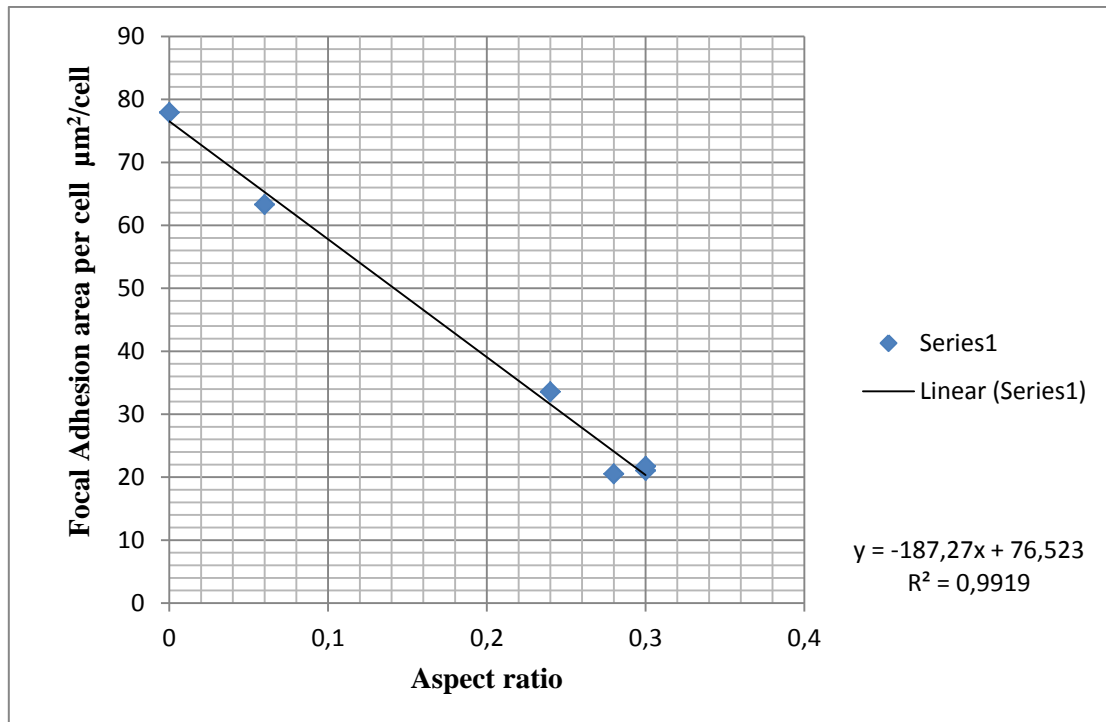

**Figure S5.** Determining the degree of linearity of wrinkle aspect ratio vs focal adhesion area/cell shows an  $R^2$ -value of 0.992 indicating that the trend can indeed be perceived as linear.
